# Supplementary material
Source: PubMed Central journal article supplement (PMC3689203)

Supp Fig. 2

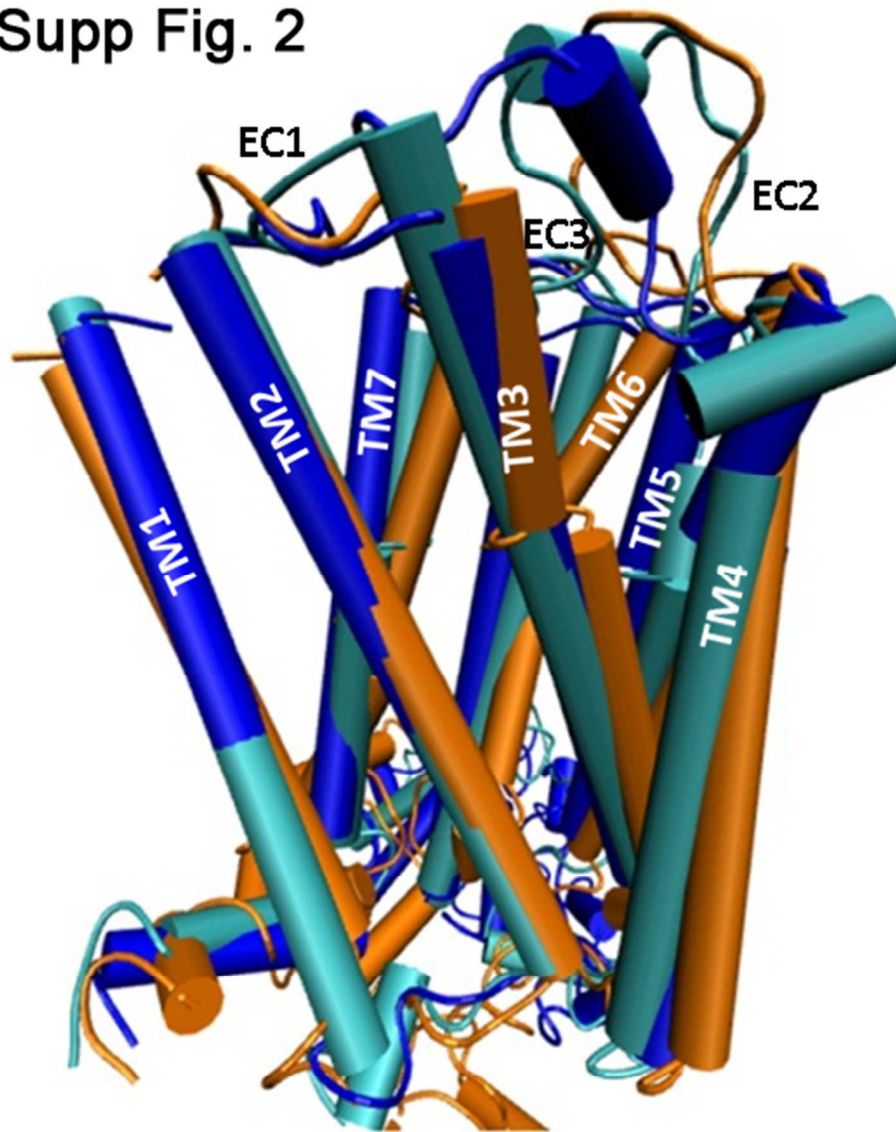

24x29mm (600 x 600 DPI)

Supplement: cn3002202_si_003.pdf [file cn3002202_si_003.pdf]

Supp Fig. 3

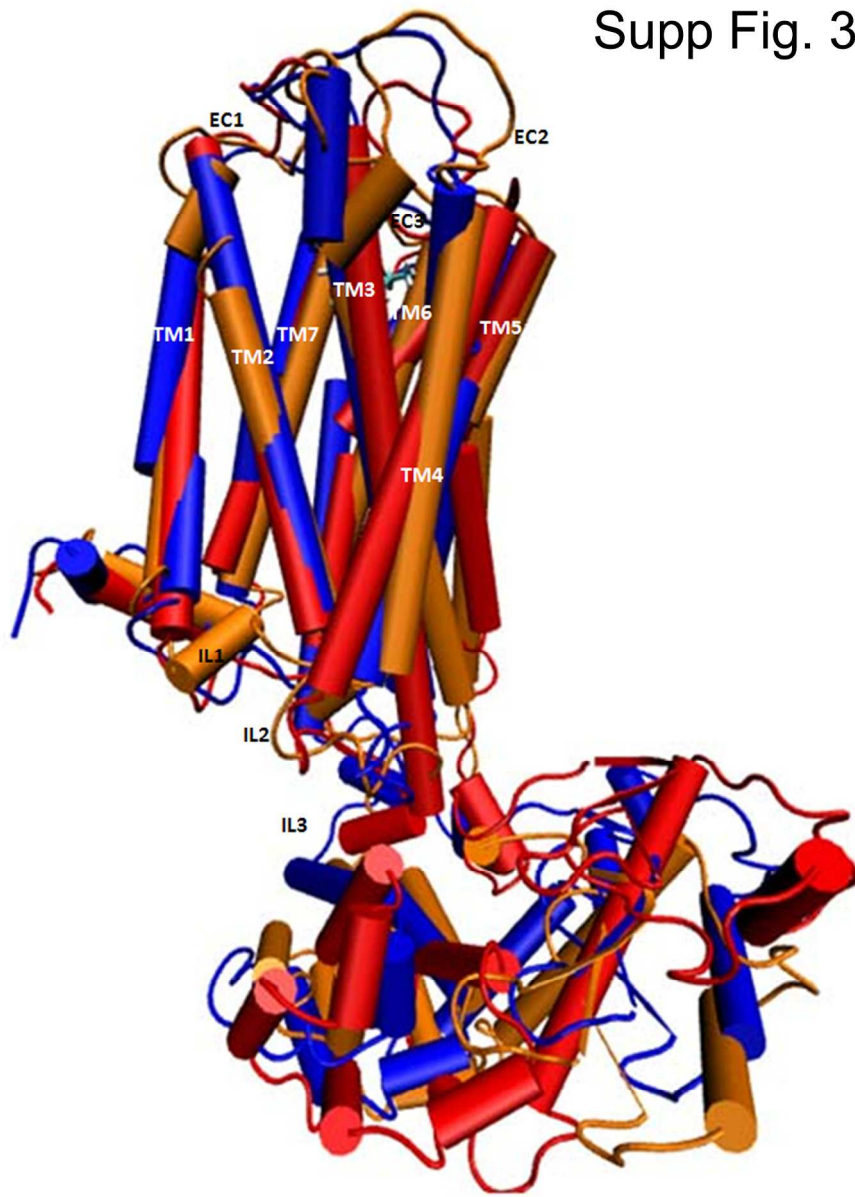

99x131mm (600 x 600 DPI)

Supplement: cn3002202_si_004.pdf [file cn3002202_si_004.pdf]

## Suppl Fig. 4

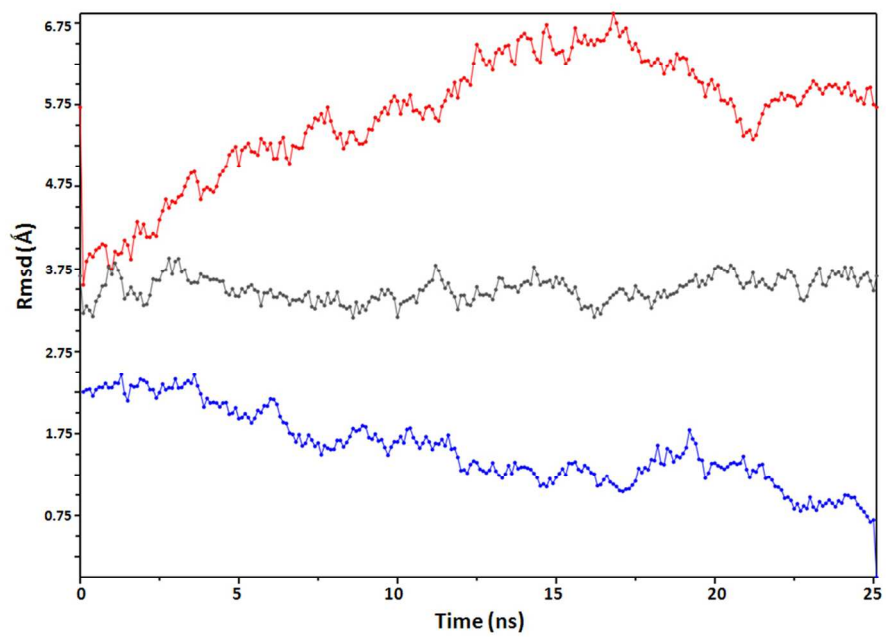

137x113mm (300 x 300 DPI)

Supplement: cn3002202_si_005.pdf [file cn3002202_si_005.pdf]

Suppl Fig. 5

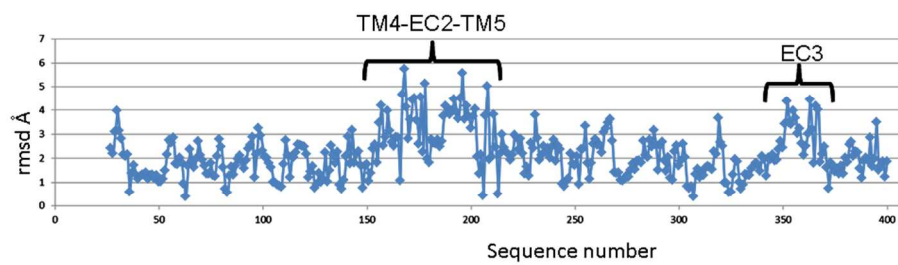

44x17mm (600 x 600 DPI)

Supplement: cn3002202_si_006.pdf [file cn3002202_si_006.pdf]
